# Supplementary material
Source: HighWire-hosted journal article supplement (https://jnm.snmjournals.org/highwire/filestream/94254/field_highwire_adjunct_files/0/94458_Supplemental_Data.pdf)
Supplement: 94458_Supplemental_Data.pdf [file 94458_Supplemental_Data.pdf]

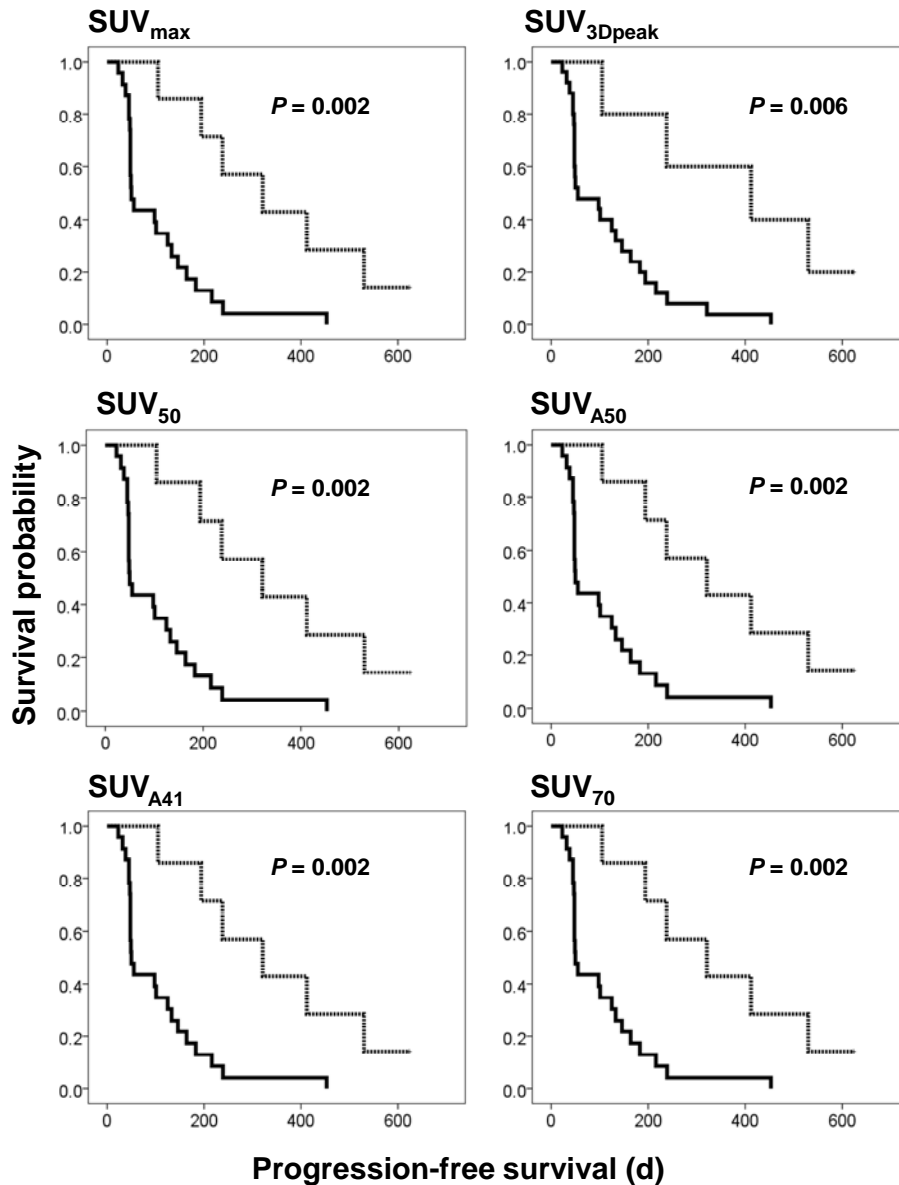

**Supplemental Figure 1.**

**Sum of SUV early FDG-PET (week 1)**

Progression-free survival is shown for metabolically responding and non-responding patients using the sum SUVs measured in up to five lesions. Best differentiation was observed using SUV<sub>max</sub>, SUV<sub>3Dpeak</sub>, SUV<sub>50</sub>, SUV<sub>A50</sub>, SUV<sub>A41</sub>, SUV<sub>70</sub>, and SUV<sub>A70</sub>.

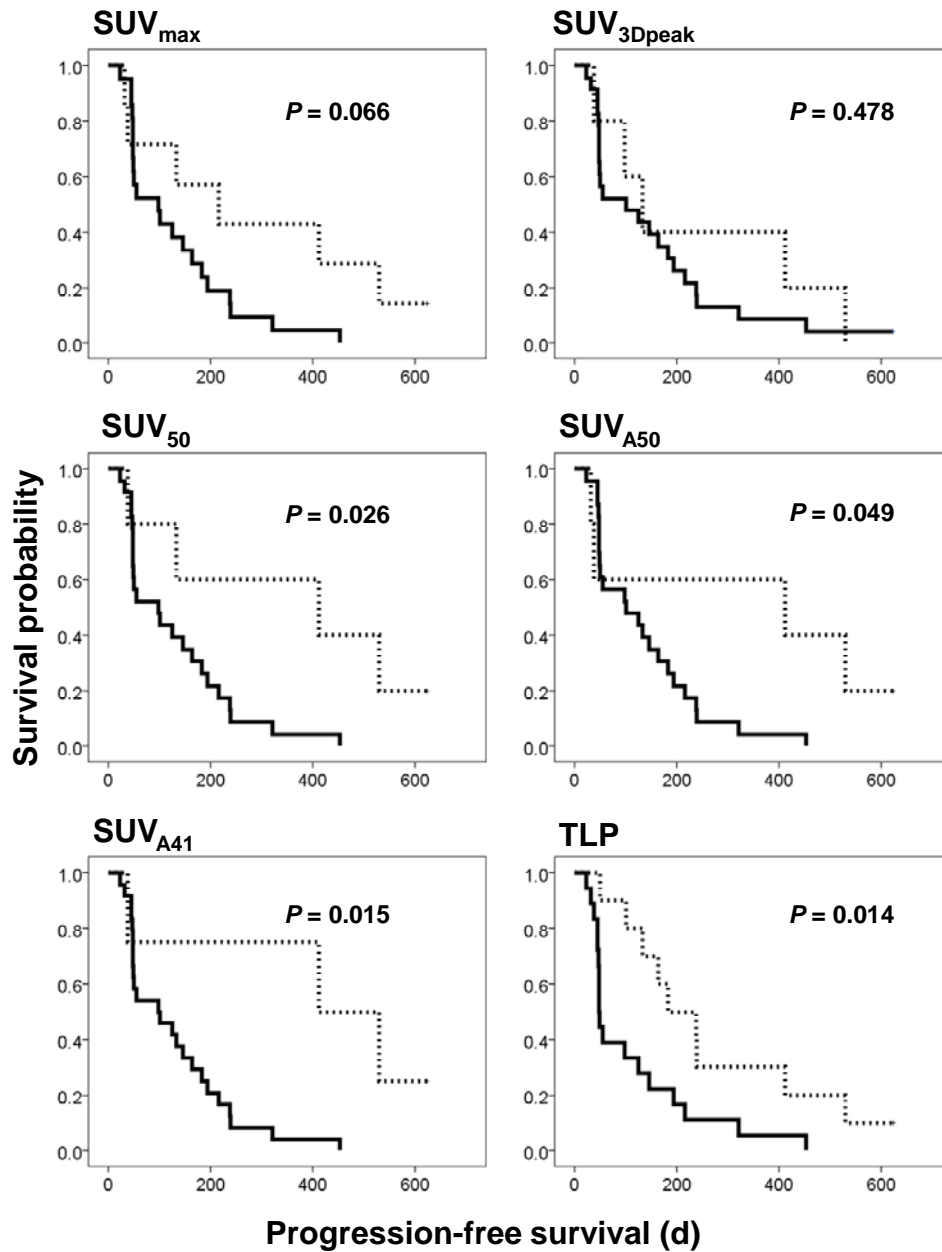

**Supplemental Figure 2.**

**Single hottest SUV at early FLT-PET (week 1)**

Progression-free survival is shown for metabolically responding and non-responding patients assessed by the single hottest value. Best differentiation was observed using SUV<sub>50</sub>, SUV<sub>A50</sub>, SUV<sub>A41</sub>, and TLP.

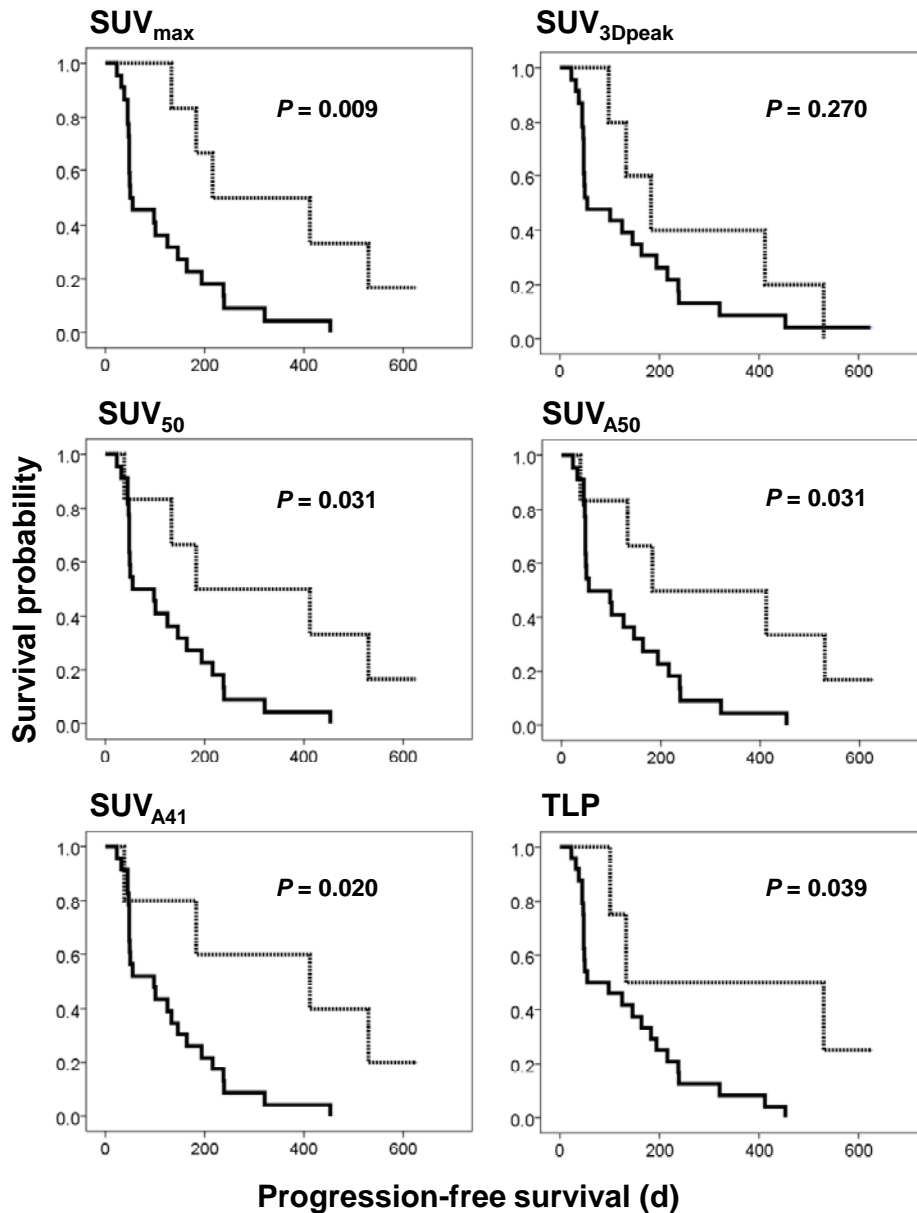

**Supplemental Figure 3.**

**Sum of SUV early FLT-PET (week 1)**

Progression-free survival is shown for metabolically responding and non-responding patients assessed by the sum of up to five SUVs. Best differentiation was observed using SUV<sub>max</sub>, SUV<sub>50</sub>, SUV<sub>A50</sub>, SUV<sub>A41</sub>, VOL<sub>50</sub>, and TLP.

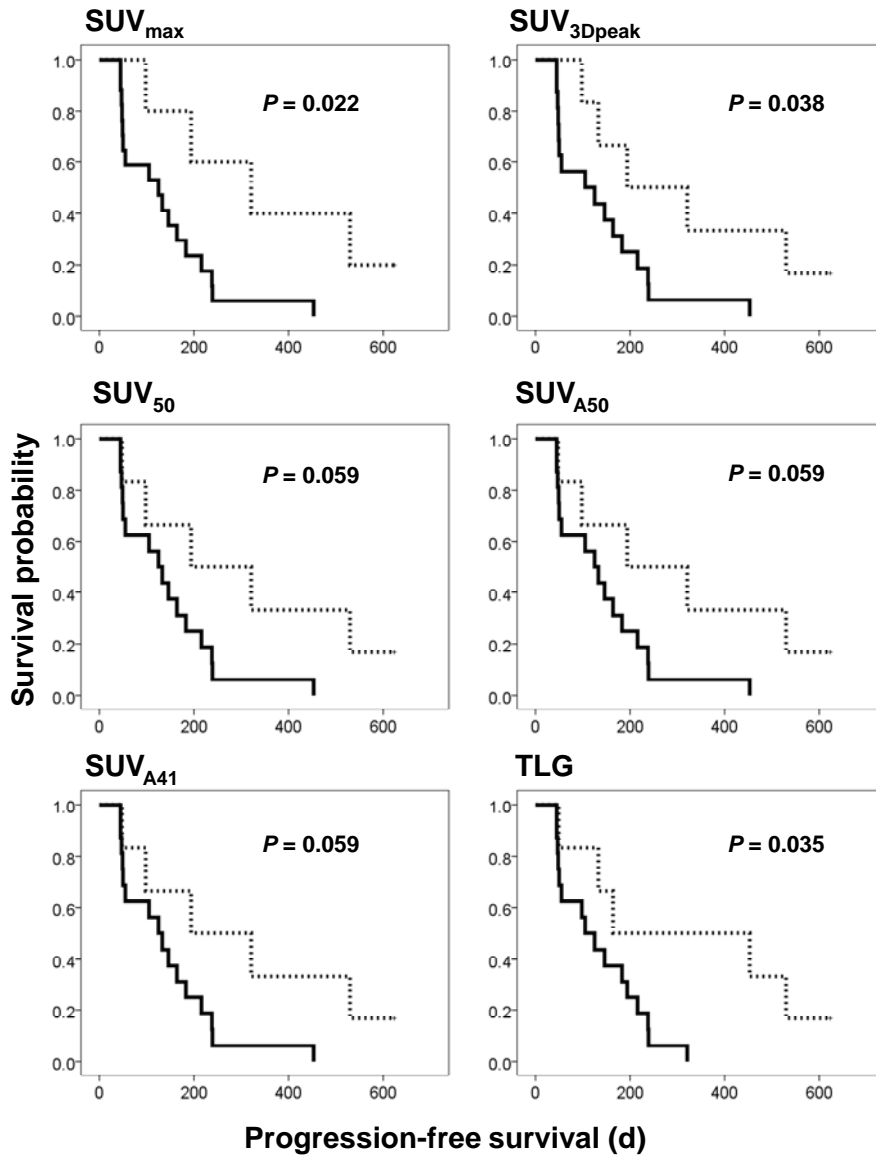

**Supplemental Figure 4.**

**Single hottest SUV late FDG-PET (week 6)**

Using the single hottest value for metabolic response measurement significant predictive differentiation was observed using  $SUV_{max}$ ,  $SUV_{3Dpeak}$ ,  $SUV_{A70}$ , and the TLG. Other quantitative measurements did not show significant results.

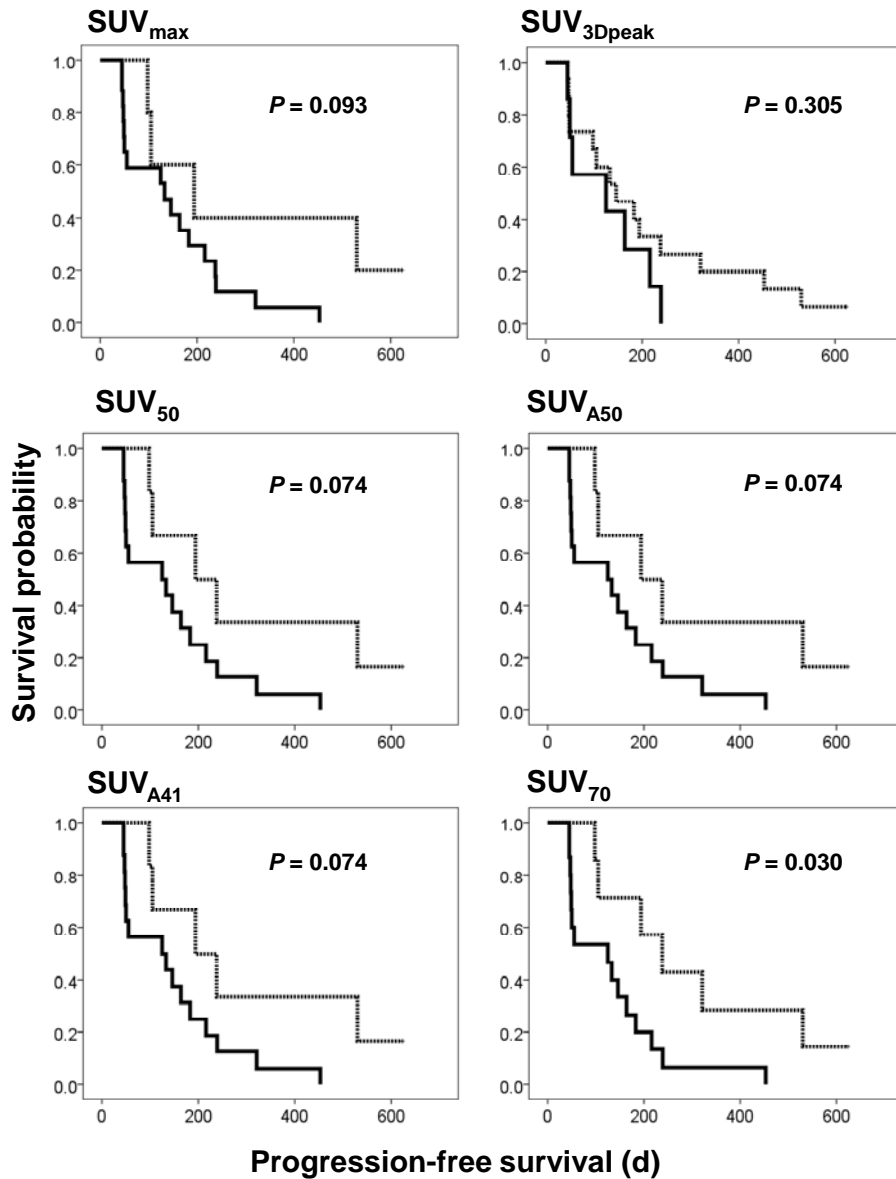

**Supplemental Figure 5.**

**Sum of SUV late FDG-PET (week 6)**

Predictive differentiation assessed by the sum of up to five SUVs in late FDG-PET. In contrast to SUV<sub>2Dpeak</sub>, SUV<sub>70</sub>, SUV<sub>A70</sub>, and the TLG other values brought no significant results.

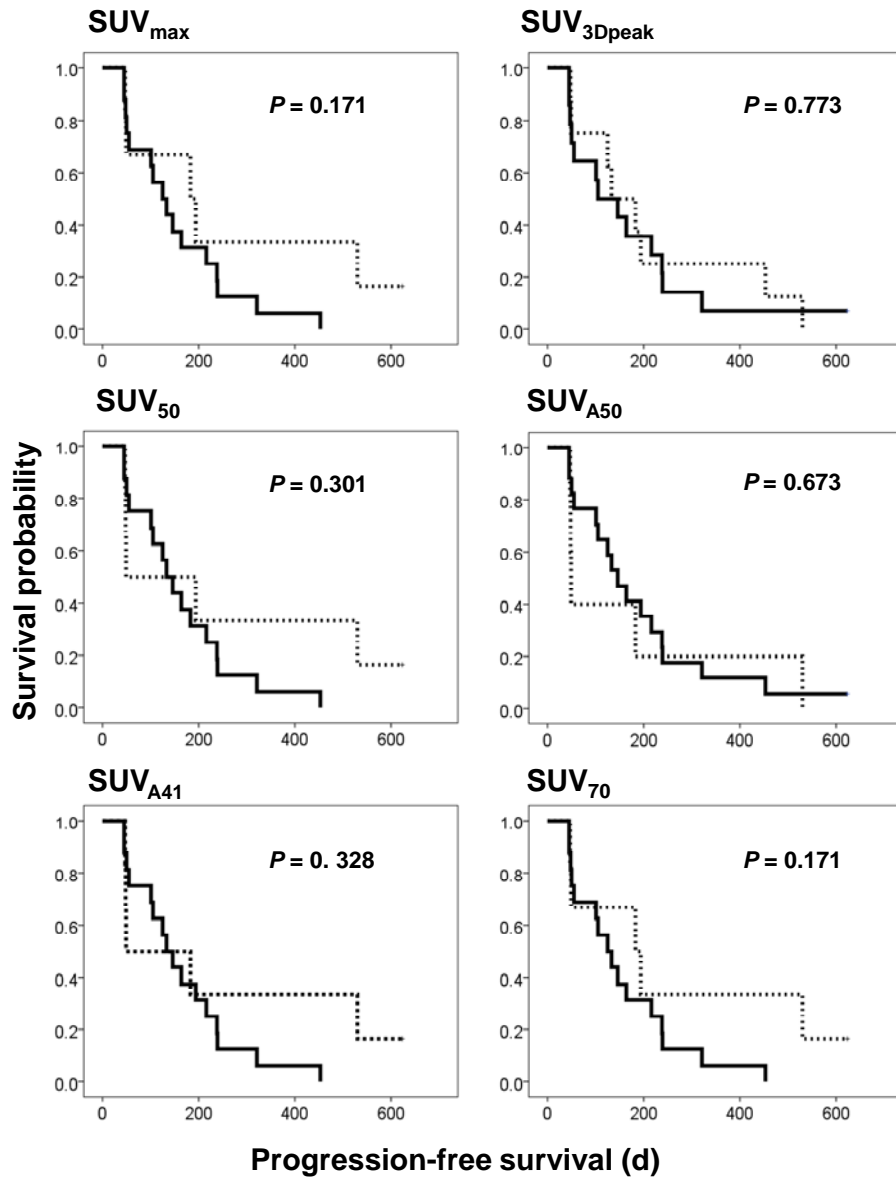

**Supplemental Figure 6.**

**Single hottest SUV late FLT-PET (week 6)**

Progression-free survival is shown for metabolic responding and non-responding patients using the single SUV measured in the hottest lesion. No quantitative response measurement brought significant results.

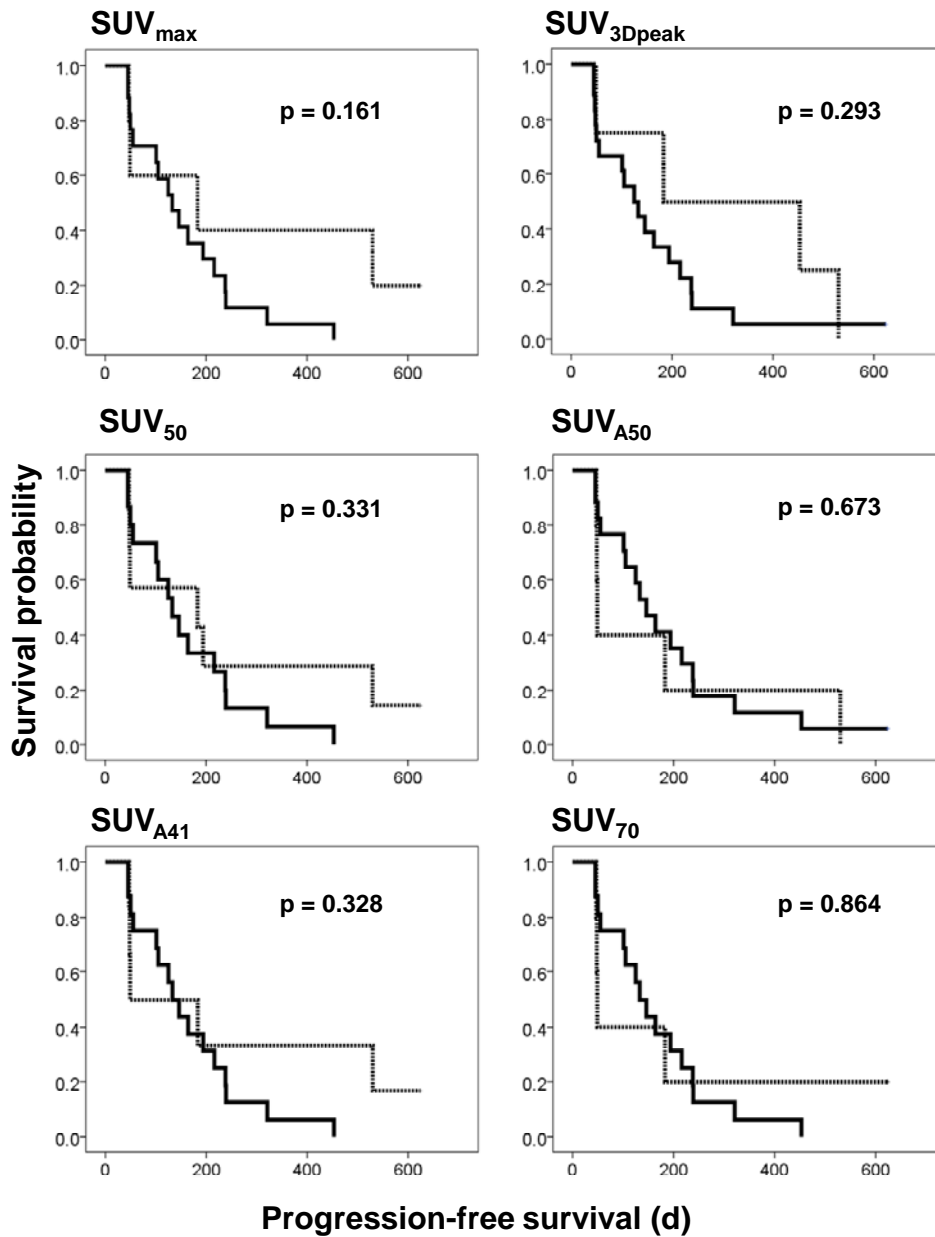

**Supplemental Figure 7.**

**Sum of SUV late FLT PET (week 6)**

Progression-free survival is shown for metabolic response measurement by several summed SUVs measured in up to five lesions. No quantitative value brought significant results.
